# Supplementary material for: Morphological and charge transport properties of amorphous and crystalline P3HT and PBTTT: insights from theory
Source: Royal Society of Chemistry journal article supplement (doi:10.1039/c5cp02769a), 2015-01-01
Supplement: c5cp02769a1.pdf [file c5cp02769a1.pdf]

# Supporting information for: Morphology and Charge Transport in Amorphous and Crystalline P3HT and PBTTT: Insights From Theory.

Domenico Alberga,<sup>†</sup> Aurélie Perrier,<sup>‡,¶</sup> Ilaria Ciofini,<sup>‡</sup> Giuseppe Felice  
Mangiatordi,<sup>§</sup> Gianluca Lattanzi,<sup>\*,†</sup> and Carlo Adamo<sup>\*,‡,||</sup>

*Dipartimento di Fisica, Università di Bari “Aldo Moro”, INFN & TIRES, Via Orabona 4,  
I-70126 Bari, Italy, PSL Research University, Chimie ParisTech - CNRS, Institut de  
Recherche de Chimie Paris, F-75005, Paris, France, Université Paris Diderot, Sorbonne  
Paris Cité, 5 rue Thomas Mann, 75205 Paris cedex 13, France, Dipartimento di Farmacia  
- Scienze del Farmaco, Università di Bari “Aldo Moro”, Via Orabona, 4, I-70126 Bari,  
Italy, and Institut Universitaire de France, 103 Bd Saint-Michel, F-75005 Paris, France*

E-mail: gianluca.lattanzi@uniba.it; carlo.adamo@chimie-paristech.fr

---

\*To whom correspondence should be addressed

<sup>†</sup>Dipartimento di Fisica, Università di Bari “Aldo Moro”, INFN & TIRES, Via Orabona 4, I-70126 Bari, Italy

<sup>‡</sup>PSL Research University, Chimie ParisTech - CNRS, Institut de Recherche de Chimie Paris, F-75005, Paris, France

<sup>¶</sup>Université Paris Diderot, Sorbonne Paris Cité, 5 rue Thomas Mann, 75205 Paris cedex 13, France

<sup>§</sup>Dipartimento di Farmacia - Scienze del Farmaco, Università di Bari “Aldo Moro”, Via Orabona, 4, I-70126 Bari, Italy

<sup>||</sup>Institut Universitaire de France, 103 Bd Saint-Michel, F-75005 Paris, France

# Force field

The energy for the force field used corresponds to the CHARMM functional form:

$$\begin{aligned}
 U = & \sum_{bonds} K_r (r - r_0)^2 + \sum_{angles} K_\theta (\theta - \theta_0)^2 + \sum_{dihedrals} \sum_{n=1}^3 K_n (1 + \cos(n\Phi + \delta_n)) \\
 & + \sum_{impropers} K_\psi (\psi - \psi_0)^2 + \sum_{nonbonded} \left\{ \epsilon_{ij} \left[ \left( \frac{R_{min,i,j}}{r_{ij}} \right)^{12} - 2 \left( \frac{R_{min,i,j}}{r_{ij}} \right)^6 \right] + \frac{q_i q_j e^2}{r_{ij}} \right\}. \quad (1)
 \end{aligned}$$

were both  $\epsilon_{ij}$  and  $R_{min,i,j}$  were obtained through a geometric combination of the atomic  $R_{min,i}$  and  $\epsilon_i$ . All the parameters are reported in Table S1 (nonbonded), S2 (bonds), S3 (angles) and S4 (dihedrals). Parameters for P3HT and PBTTT were taken from Do et al.<sup>S1,S2</sup> and Marcon and Raos.<sup>S3</sup> Harmonic improper dihedral potentials  $V_{improper} = K_\psi (\psi - \psi_0)^2$  were defined to maintain the planarity of the thiophene rings in P3HT and thienothiophenes in PBTTT with  $K_\psi = 20 \text{ kcal/mol/rad}^2$ . The chemical structures of the polymers and solvents with the atom types used for the parameters, are depicted in Figure S1.

Table S1: Nonbonded parameters used in atomistic simulation. Atom types are defined in Figure S1.

| Atom type i | $\epsilon_i(kcal/mole)$ | $R_{min,i}/2 (\text{\AA})$ | $q_i (e)$ |
|-------------|-------------------------|----------------------------|-----------|
| S1          | 0.250000                | 1.9923701                  | -0.149600 |
| C1          | 0.070000                | 1.9923701                  | 0.074800  |
| C2          | 0.070000                | 1.9923701                  | -0.181700 |
| C3          | 0.070000                | 1.9923701                  | -0.141200 |
| C4          | 0.066000                | 1.9643090                  | 0.074800  |
| C5          | 0.066000                | 1.9643090                  | -0.120000 |
| C6          | 0.066000                | 1.9643090                  | -0.180000 |
| H1          | 0.030000                | 1.3581791                  | 0.181700  |
| H2          | 0.030000                | 1.3581791                  | 0.216000  |
| H3          | 0.030000                | 1.4030776                  | 0.060000  |

Table S2: Parameters used in harmonic bond length potential  $U_{bond}(r) = K_r (r - r_0)^2$  in atomistic simulation. Atom types are defined in Figure S1.

| Bond type | $K_r(kcal/mole/\text{\AA}^2)$ | $r_0(\text{\AA})$ |
|-----------|-------------------------------|-------------------|
| S1 C1     | 291.25                        | 1.732             |
| C1 C2     | 514.27                        | 1.364             |
| C2 C2     | 453.10                        | 1.428             |
| C2 C3     | 514.27                        | 1.364             |
| C2 H1     | 370.63                        | 1.080             |
| C1 C1     | 392.29                        | 1.430             |
| C3 H2     | 370.63                        | 1.080             |
| C3 S1     | 291.25                        | 1.732             |
| C2 C4     | 317.00                        | 1.510             |
| C4 C5     | 268.00                        | 1.529             |
| C5 C5     | 268.00                        | 1.529             |
| C5 C6     | 268.00                        | 1.529             |
| C4 H3     | 340.00                        | 1.090             |
| C5 H3     | 340.00                        | 1.090             |
| C6 H3     | 340.00                        | 1.090             |

Table S3: Parameters used in harmonic bond angle potential  $U_{angle}(\theta) = K_{\theta}(\theta - \theta_0)^2$  in atomistic simulation. Atom types are defined in Figure S1.

| Angle type | $K_{\theta}(kcal/mole/rad^2)$ | $\theta_0$ (deg.) |
|------------|-------------------------------|-------------------|
| C1 S1 C1   | 86.360                        | 92.774            |
| C1 S1 C3   | 86.360                        | 92.774            |
| S1 C1 C2   | 86.360                        | 110.292           |
| C1 C2 C2   | 39.582                        | 113.322           |
| C1 C2 C1   | 39.582                        | 113.322           |
| C2 C2 H1   | 35.263                        | 123.700           |
| C2 C2 C3   | 39.582                        | 113.322           |
| C2 C3 S1   | 86.360                        | 110.292           |
| C2 C1 C1   | 54.694                        | 130.140           |
| C2 C3 H2   | 35.263                        | 125.100           |
| C1 C2 H1   | 35.263                        | 122.979           |
| C3 C2 H1   | 35.263                        | 122.979           |
| S1 C1 C1   | 41.740                        | 119.569           |
| S1 C3 H1   | 28.787                        | 124.609           |
| C2 C2 C4   | 70.000                        | 123.700           |
| C1 C2 C4   | 70.000                        | 122.979           |
| C3 C2 C4   | 70.000                        | 122.979           |
| C2 C4 C5   | 63.000                        | 114.000           |
| C2 C4 H3   | 35.000                        | 109.500           |
| C4 C5 C5   | 58.350                        | 112.700           |
| C5 C5 C5   | 58.350                        | 112.700           |
| C5 C5 C6   | 58.350                        | 112.700           |
| C4 C5 H3   | 37.500                        | 110.700           |
| C5 C4 H3   | 37.500                        | 110.700           |
| C5 C5 H3   | 37.500                        | 110.700           |
| C5 C6 H3   | 37.500                        | 110.700           |
| C6 C5 H3   | 37.500                        | 110.700           |
| H3 C4 H3   | 33.000                        | 107.800           |
| H3 C5 H3   | 33.000                        | 107.800           |
| H3 C6 H3   | 33.000                        | 107.800           |
| H2 C3 S1   | 28.787                        | 124.609           |

Table S4: Parameters used in dihedral potential  $U_{dihedral}(\Phi) = K_n(1 + \cos(n\Phi + \delta_n))$  in atomistic simulation. Atom types are defined in Figure S1.

| Dihedral type | $K_n(kcal/mole)$ | n | $\delta_n$ (deg.) |
|---------------|------------------|---|-------------------|
| C2 C4 C5 C5   | 0.650            | 1 | 0.0               |
|               | -0.025           | 2 | 180.0             |
|               | 0.100            | 3 | 0.0               |
| C2 C4 C5 H3   | 0.231            | 3 | 0.0               |
| C4 C5 C5 C5   | 0.650            | 1 | 0.0               |
|               | -0.025           | 2 | 180.0             |
|               | 0.100            | 3 | 0.0               |
| C5 C5 C5 C5   | 0.650            | 1 | 0.0               |
|               | -0.025           | 2 | 180.0             |
|               | 0.100            | 3 | 0.0               |
| C5 C5 C5 C6   | 0.650            | 1 | 0.0               |
|               | -0.025           | 2 | 180.0             |
|               | 0.100            | 3 | 0.0               |
| H3 C4 C5 C5   | 0.150            | 3 | 0.0               |
| H3 C5 C5 C5   | 0.150            | 3 | 0.0               |
| H3 C5 C6 H3   | 0.150            | 3 | 0.0               |
| C4 C5 C5 H3   | 0.150            | 3 | 0.0               |
| H3 C4 C5 H3   | 0.150            | 3 | 0.0               |
| H3 C5 C5 H3   | 0.150            | 3 | 0.0               |
| C5 C5 C6 H3   | 0.150            | 3 | 0.0               |
| H3 C5 C5 C6   | 0.150            | 3 | 0.0               |
| C2 C2 C4 H3   | 0.000            | 1 | 0.0               |
| C2 C2 C4 C5   | 0.000            | 1 | 0.0               |
| C1 C2 C4 H3   | 0.000            | 1 | 0.0               |
| C3 C2 C4 H3   | 0.000            | 1 | 0.0               |
| C1 C2 C4 C5   | 0.000            | 1 | 0.0               |
| C3 C2 C4 C5   | 0.000            | 1 | 0.0               |
| C2 C1 C1 S1   | 0.000            | 2 | 180.0             |
| C2 C1 C1 C2   | 0.000            | 2 | 180.0             |
| S1 C1 C1 S1   | -0.0783          | 1 | 0.0               |
|               | 2.7092           | 2 | 180.0             |
|               | 0.0712           | 3 | 0.0               |
| C3 S1 C1 C2   | 6.1465           | 2 | 180.0             |
| C3 C2 C2 C1   | -0.495           | 1 | 0.0               |
|               | 1.579            | 2 | 180.0             |
| C2 C2 C1 S1   | 9.2675           | 2 | 180.0             |
|               | 3.000            | 3 | 0.0               |
| C2 C3 S1 C1   | 6.608            | 2 | 180.0             |
| C2 C2 C3 S1   | 10.413           | 2 | 180.0             |
| C1 C2 C2 C1   | 3.000            | 3 | 0.0               |
|               | -0.495           | 1 | 0.0               |

|             |        |   |       |
|-------------|--------|---|-------|
|             | 1.6515 | 2 | 180.0 |
| C1 S1 C1 C2 | 6.6935 | 2 | 180.0 |
| C1 C2 C1 S1 | 3.625  | 2 | 180.0 |
| C1 C2 C1 C1 | -0.495 | 1 | 0.0   |
|             | 1.6515 | 2 | 180.0 |
| C1 S1 C1 C1 | 6.6935 | 2 | 180.0 |
| S1 C1 C1 S1 | 3.625  | 2 | 180.0 |
| S1 C1 C1 C2 | 9.2675 | 2 | 180.0 |
| S1 C1 C1 C2 | 3.000  | 3 | 0.0   |
| C2 C1 C1 C2 | 3.625  | 2 | 180.0 |
| C1 C2 C2 H1 | 0.125  | 1 | 0.0   |
|             | 1.906  | 2 | 180.0 |
|             | -0.275 | 3 | 0.0   |
| C3 C2 C2 H1 | 0.125  | 1 | 0.0   |
|             | 1.8215 | 2 | 180.0 |
|             | -0.275 | 3 | 0.0   |
| S1 C3 C2 H1 | -2.121 | 1 | 0.0   |
|             | 3.261  | 2 | 180.0 |
| H2 C3 C2 H1 | 5.068  | 2 | 180.0 |
| C1 S1 C3 H2 | 0.466  | 2 | 180.0 |
| H2 C3 C2 C2 | 0.125  | 1 | 0.0   |
|             | 3.966  | 2 | 180.0 |
|             | -0.275 | 3 | 0.0   |
| S1 C1 C2 H1 | -2.121 | 1 | 0.0   |
|             | 2.9020 | 2 | 180.0 |
| C1 C1 C2 H1 | 0.125  | 1 | 0.0   |
|             | 1.906  | 2 | 180.0 |
|             | -0.275 | 3 | 0.0   |
| C1 C1 S1 C1 | 0.382  | 2 | 180.0 |
|             | 0.200  | 3 | 0.0   |
| C2 C2 C1 C1 | -0.335 | 1 | 0.0   |
|             | 3.922  | 2 | 180.0 |
| C3 S1 C1 C1 | 0.383  | 2 | 180.0 |
|             | 0.200  | 3 | 0.0   |
| C1 C1 C2 H1 | 0.125  | 1 | 0.0   |
|             | 3.5295 | 2 | 180.0 |
|             | -0.275 | 3 | 0.0   |
| C1 C1 C2 C1 | -0.335 | 1 | 0.0   |
|             | 3.922  | 2 | 180.0 |
| C1 C1 C2 C4 | 0.125  | 1 | 0.0   |
|             | 3.5295 | 2 | 180.0 |
|             | -0.275 | 3 | 0.0   |
| C3 C2 C2 C4 | 0.125  | 1 | 0.0   |
|             | 1.8215 | 2 | 180.0 |
|             | -0.275 | 3 | 0.0   |

|             |        |   |       |
|-------------|--------|---|-------|
| S1 C1 C2 C4 | -2.121 | 1 | 0.0   |
|             | 2.9020 | 2 | 180.0 |
| H1 C2 C2 C4 | 2.435  | 2 | 180.0 |
| C1 C2 C2 C4 | 0.125  | 1 | 0.0   |
|             | 1.906  | 2 | 180.0 |
|             | -0.275 | 3 | 0.0   |
| S1 C3 C2 C4 | -2.121 | 1 | 0.0   |
|             | 3.261  | 2 | 180.0 |
| H2 C3 C2 C4 | 5.068  | 2 | 180.0 |

---

## References

- (S1) Do, K.; Huang, D. M.; Faller, R.; Moule, A. J. A comparative MD study of the local structure of polymer semiconductors P3HT and PBTTT. *Phys. Chem. Chem. Phys.* **2010**, *12*, 14735–14739.
- (S2) Huang, D. M.; Faller, R.; Do, K.; Moule, A. J. Coarse-Grained Computer Simulations of Polymer/Fullerene Bulk Heterojunctions for Organic Photovoltaic Applications. *J. Chem. Theory Comput.* **2010**, *6*, 526–537.
- (S3) Marcon, V.; Raos, G. Free Energies of Molecular Crystal Surfaces by Computer Simulation: Application to Tetrathiophene. *J. Am. Chem. Soc.* **2006**, *128*, 1408–1409.



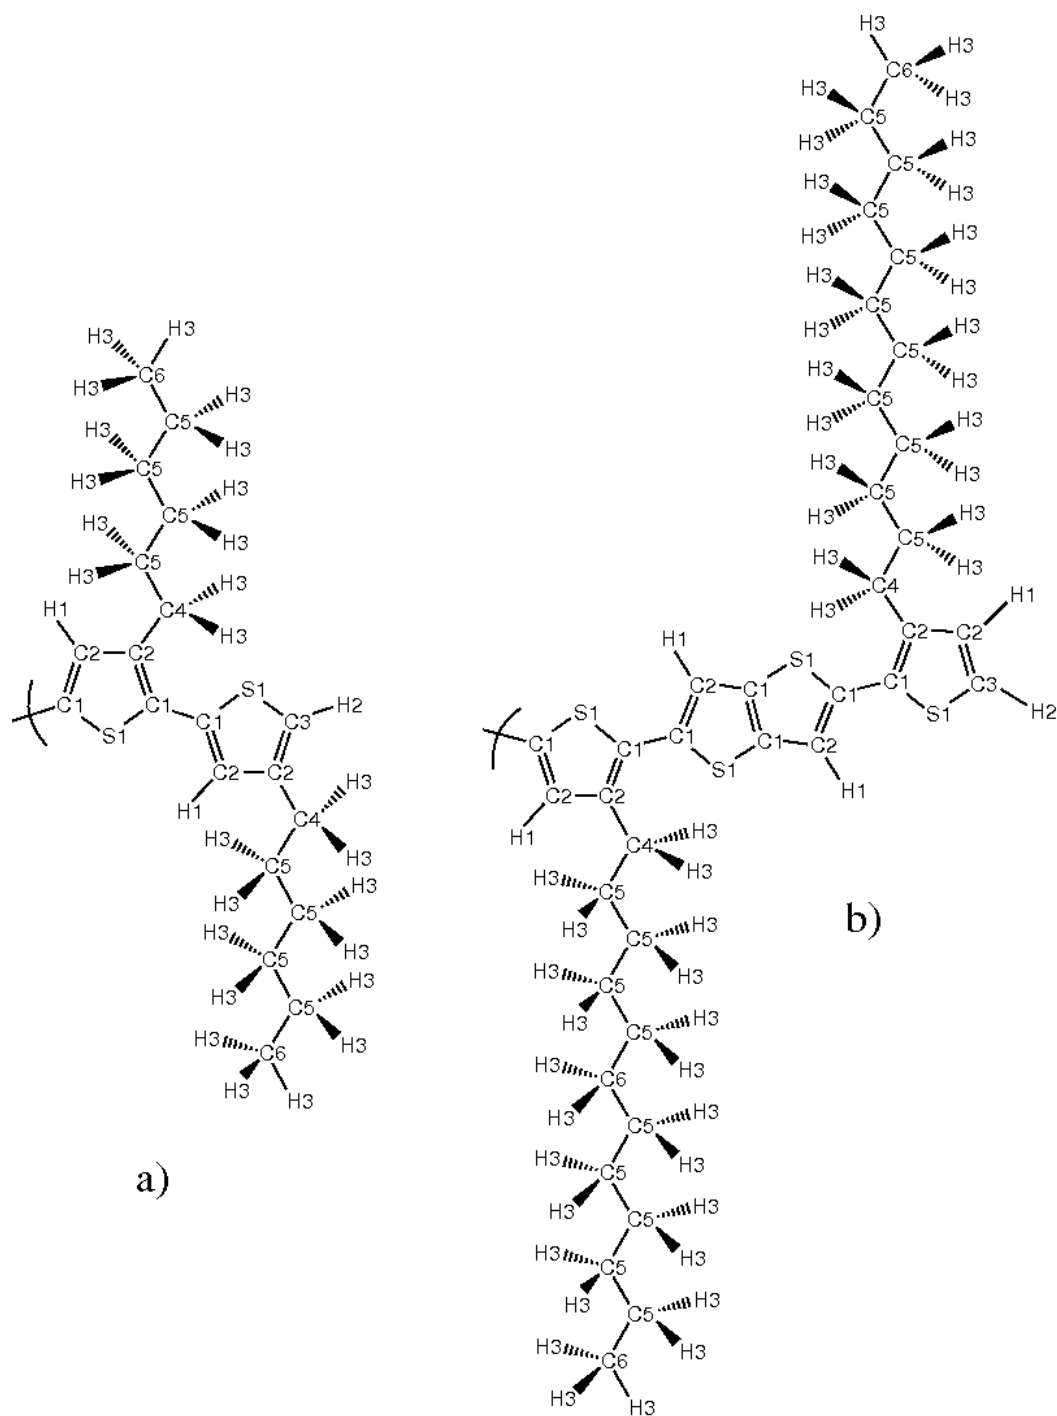

Figure S1: Chemical structure and atom types used in the force field definition of: a) the last two monomers of a poly(3-hexylthiophene) (P3HT) chain; b) the end monomer of a poly(2,5-bis(3-alkylthiophen-2-yl)thieno[3,2-b]thiophene) (PBTTT) chain.

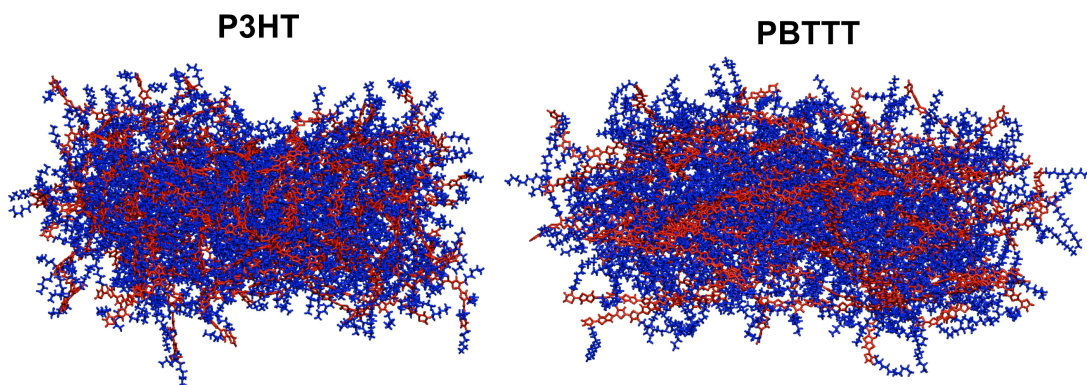

Figure S2: Representative snapshots of the simulated periodic boxes of P3HT and PBTTT in amorphous phase. The backbones of the polymers are depicted in red and the side chains in blue.
